# Supplementary material for: A fluorescence active gold nanorod–quantum dot core–satellite nanostructure for sub-attomolar tumor marker biosensing
Source: Royal Society of Chemistry journal article supplement (doi:10.1039/c5ra19628k), 2015-01-01
Supplement: c5ra19628k1.pdf [file c5ra19628k1.pdf]

## *Supporting information*

### **A fluorescence active gold nanorod-quantum dots core-satellite nanostructure for sub-attomolar tumor marker biosensing**

**Table S1** Summary of limits of detection (LODs) for PSA via various methods.

| <b>Number</b> | <b>Method</b>                      | <b>LOD of PSA</b> | <b>Reference</b>             |
|---------------|------------------------------------|-------------------|------------------------------|
| 1             | Fluorescence probe                 | 9.4fM             | (Liu et al. 2013)            |
| 2             | Nanocomposite immunosensor         | 17.6fM            | (Dey et al. 2012)            |
| 3             | Organic electrochemical transistor | 29.4fM            | (Kim et al. 2010)            |
| 4             | Enzyme immunoassay                 | 94.1pM            | (Adel Ahmed and Azzazy 2013) |
| 5             | Immunosensing probe                | 0.22pM            | (Wang et al. 2015)           |
| 6             | Electrochemistry                   | 2.94pM            | (Chuah et al. 2012)          |
| 7             | Plasmonic biosensor                | 0.12fM            | (Liang et al. 2015)          |
| 8             | Circular dichroism(CD)             | 0.015aM           | (Wu et al. 2013)             |
| 9             | Electrochemical immunosensor       | 0.16pM            | (Yang et al. 2015)           |
| 10            | SERS                               | 0.96aM            | (Xu et al. 2015)             |

7  
8

1

2 **Table S2** The PSA detection in human serum samples

| Serum samples <sup>a</sup> | Original concentration(pM) <sup>b</sup> | Diluted concentration(aM) <sup>c</sup> | Detected concentration (aM) <sup>d</sup> |
|----------------------------|-----------------------------------------|----------------------------------------|------------------------------------------|
| 1                          | 41.7                                    | 4.17                                   | 4.09±0.13                                |
| 2                          | 8.1                                     | 0.81                                   | 0.79±0.05                                |
| 3                          | 1.6                                     | 0.16                                   | 0.18±0.07                                |

3 <sup>a</sup> Serum sample NO.1to NO.3 are human sera, which are sampling from four healthy  
4 donors at the Second Hospital in Wuxi, China.

5 <sup>b</sup> Original concentrations of PSA in the sera were determined by the standard clinical  
6 diagnostic assay (ADVIA Centaur, Siemens).

7 <sup>c</sup> Original serum samples were serially diluted and then stood for at least 2 h before  
8 the determination.

9 <sup>d</sup> SD was calculated based on five parallel experiments for each sample.

10

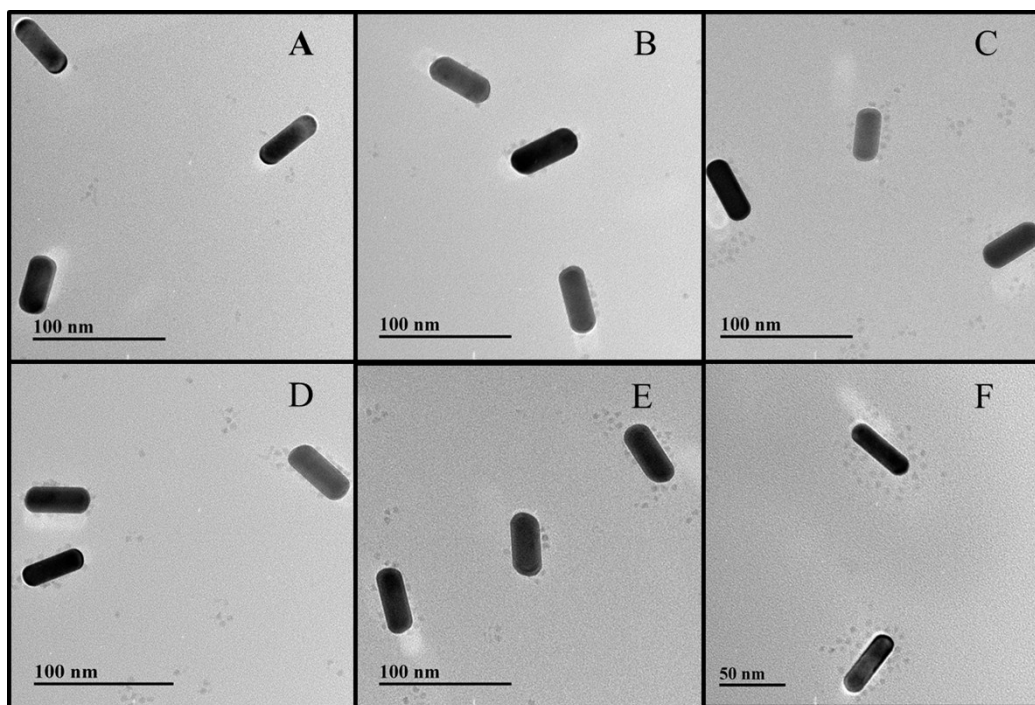

1

2 **Fig. S1** Representative TEM images of Au NRs-QDs core-satellite assemblies for  
3 different hybridization times, (A) 5 min, (B) 30 min, (C) 1h, (D) 3h, (E) 6h, and (F)  
4 12 h.

5

6

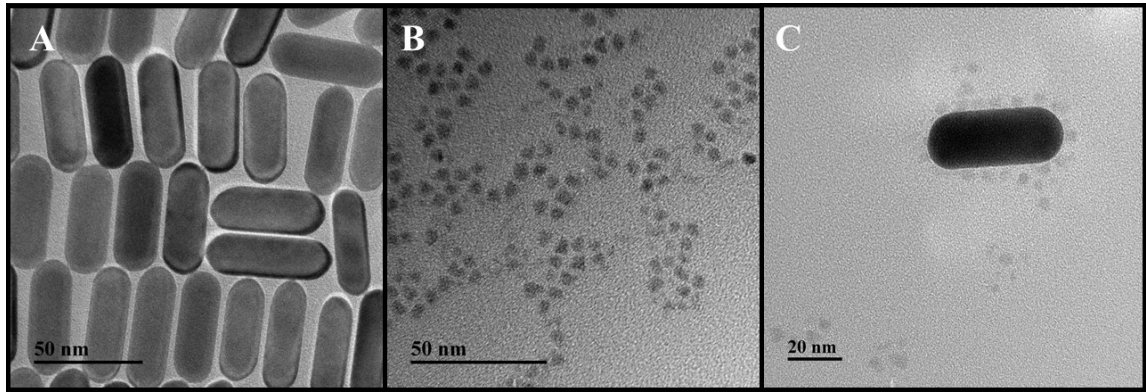

1

2 **Fig. S2** Typical TEM images of AuNR (A), QDs (B) and core-satellite assembly (C).

3

4

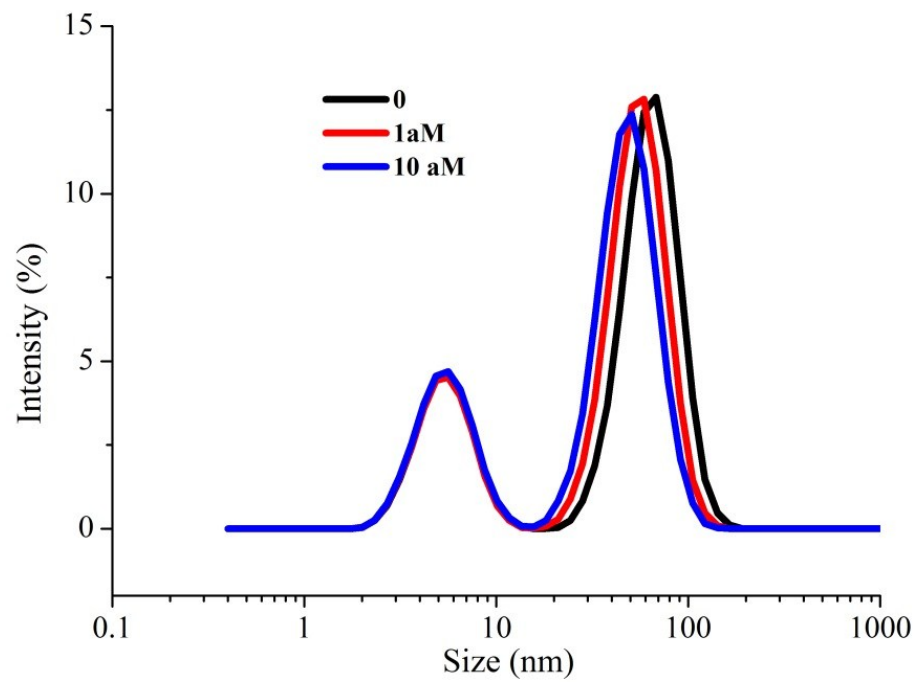

5

6 **Fig. S3** DLS of Au NR-QDs core-satellite assemblies in suspension with the  
7 addition of different concentration of PSA target.

8

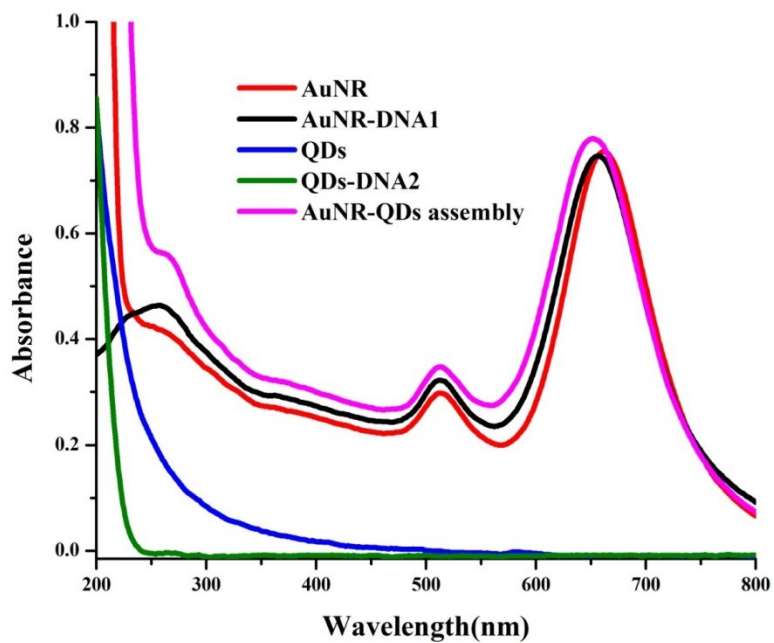

1

2 **Fig. S4** UV-Vis spectra of AuNR, AuNR-DNA1, QDs, QDs-DNA2 and Au NR-  
3 QDs core-satellite assemblies.

4

5

6

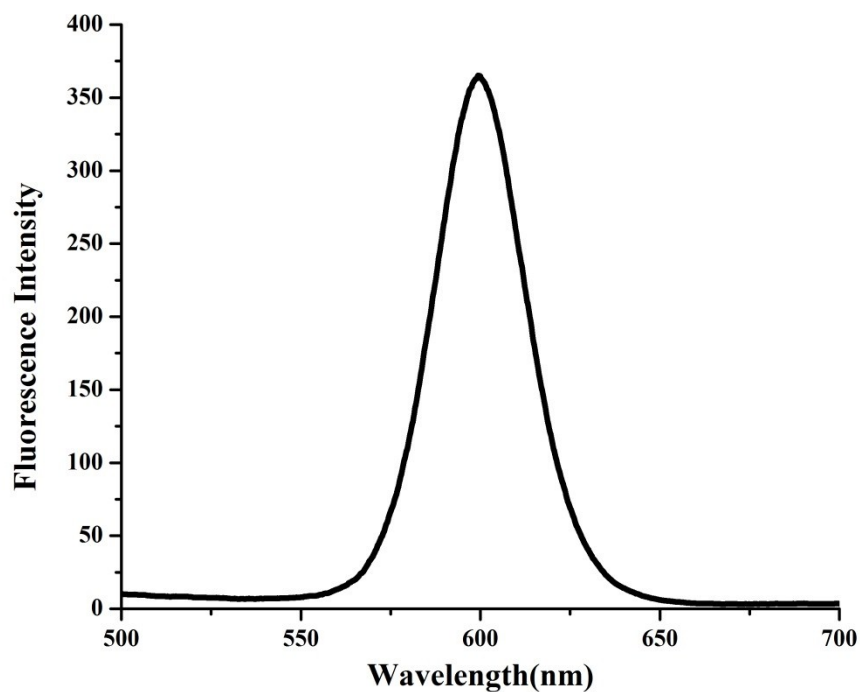

1  
2  
3  
4  
5

**Fig. S5** The emission spectrum of QDs.

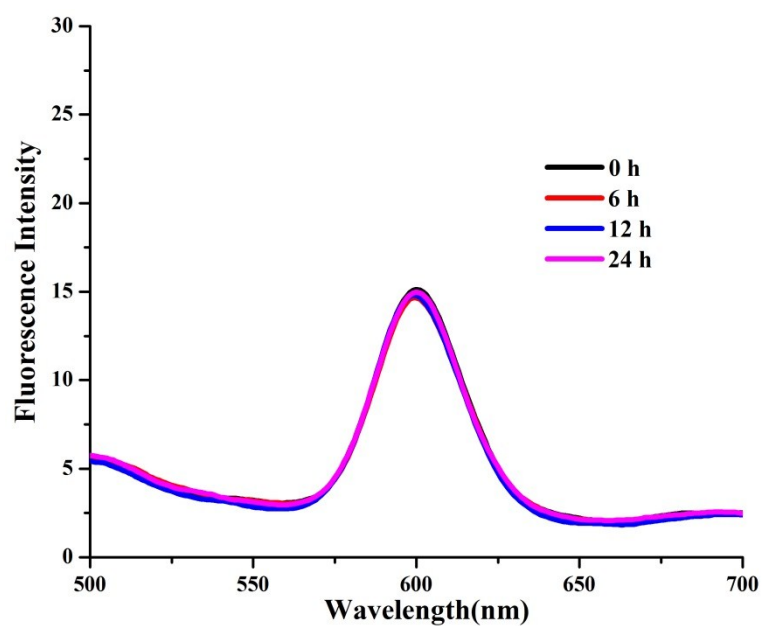

6

7 **Fig. S6** The fluorescence spectrum of the Au NR-QDs core-satellite assemblies in  
8 suspension for different time with the absence of PSA target.

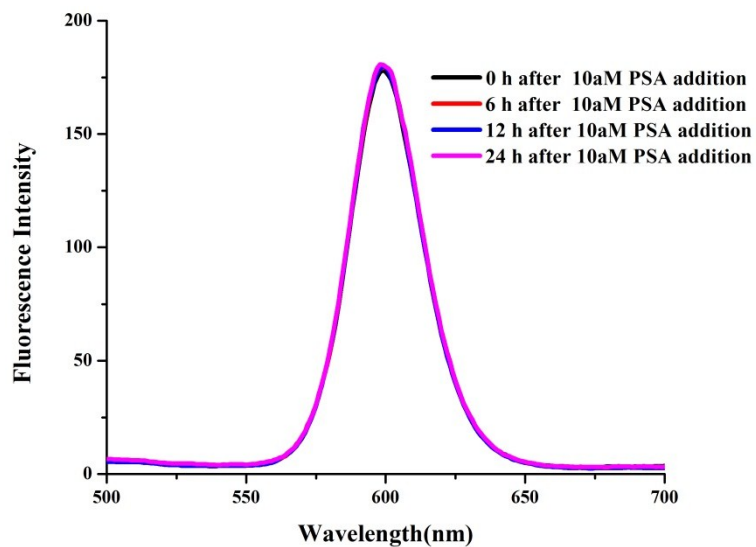

1

2 **Fig. S7** The fluorescence spectrum of the Au NR-QDs core-satellite assemblies in  
 3 suspension for different time with addition of 10 aM PSA target.

4

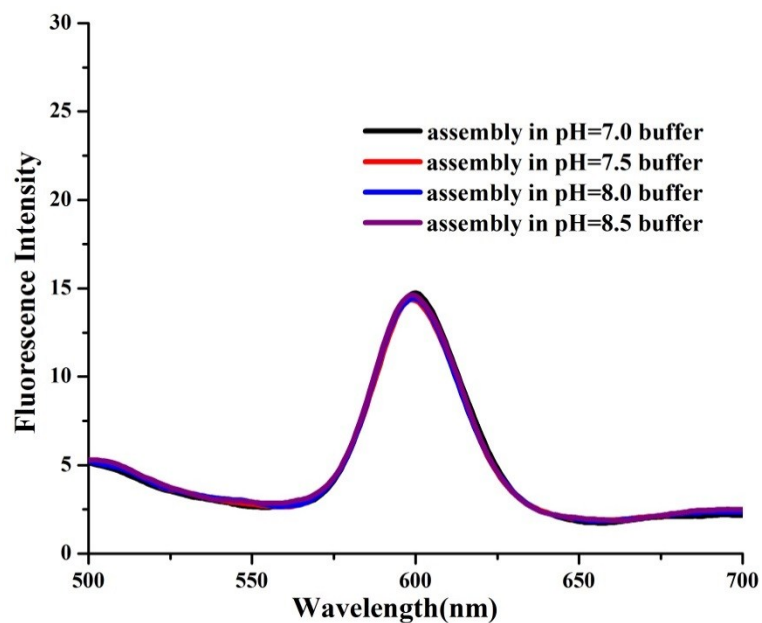

5

6 **Fig. S8** The fluorescence spectrum of the Au NR-QDs core-satellite assemblies in  
 7 suspension under different pH values with the absence of PSA target.

8

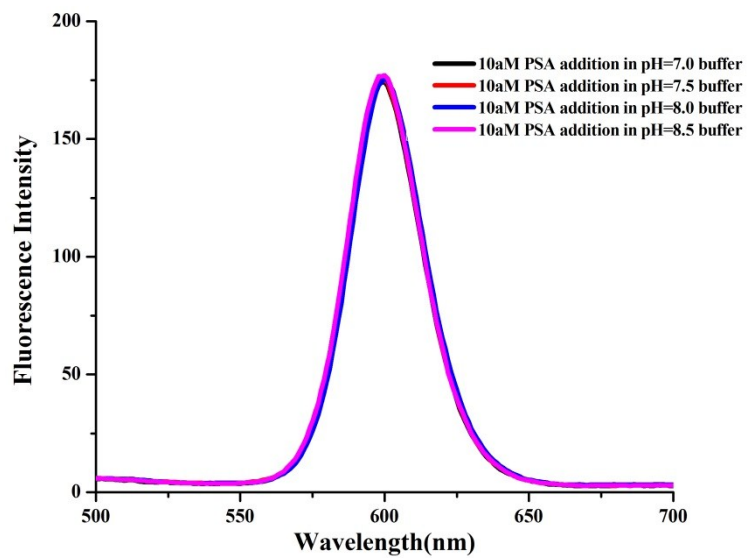

1

2 **Fig. S9** The fluorescence spectrum of the Au NR-QDs core-satellite assemblies in  
3 suspension under different pH values with addition of 10 aM PSA target.

4

5



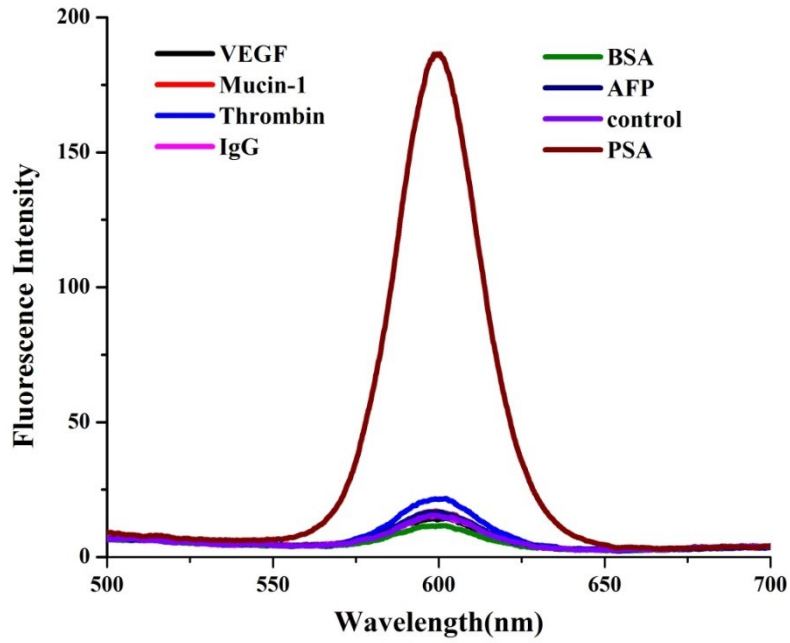

1  
2  
3

**Fig. S10** The fluorescence spectra of different targets addition.

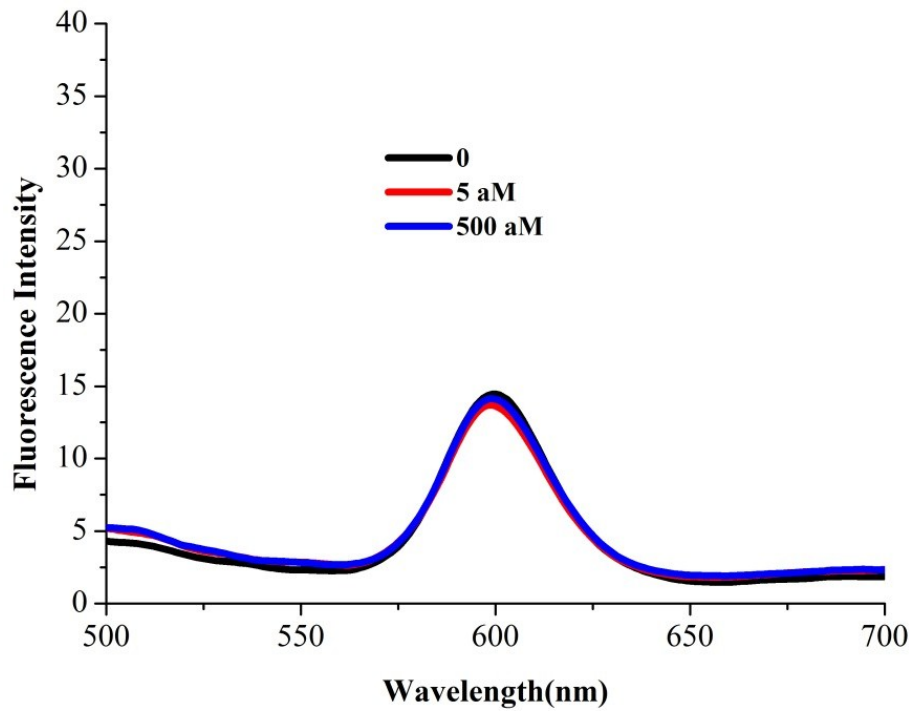

4

5 **Fig. S11** The fluorescence spectra of Au NR-QDs core-satellite assemblies for  
6 different concentration of PSA target, where the Au NR-QDs core-satellite assemblies  
7 were prepared using a DNA sequences that was not able to recognize the target PSA  
8 protein.

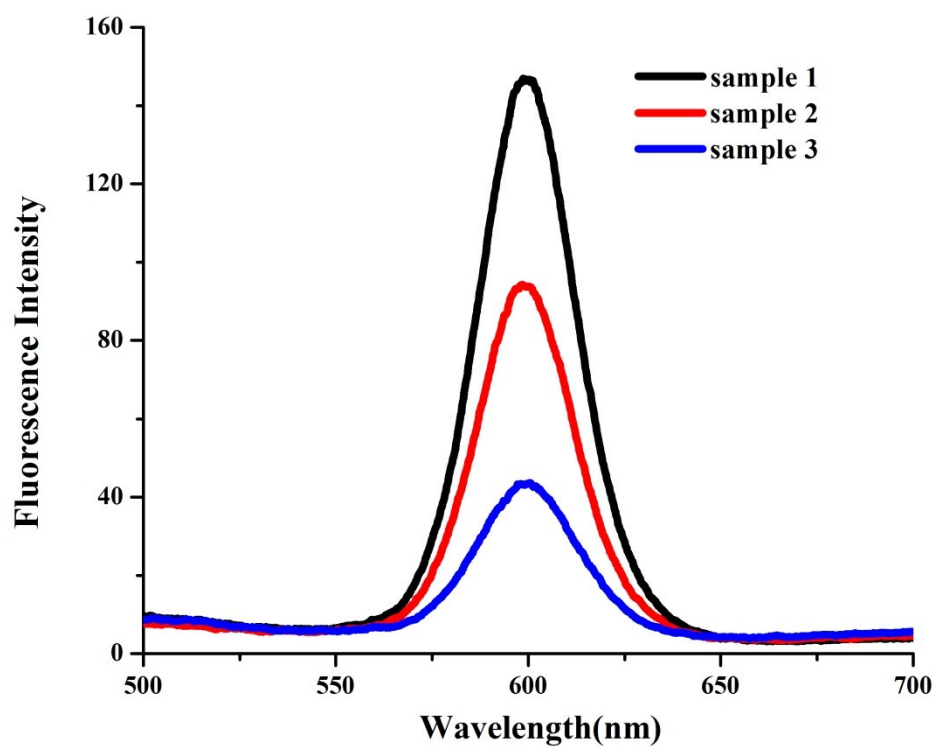

1

2 **Fig. S12** The fluorescence spectrum of the PSA detection in human serum samples.

3

1

## 2 **Reference**

3 Adel Ahmed, H., Azzazy, H.M., 2013. *Biosens Bioelectron* 49, 478-484.

4 Chuah, K., Lai, L.M., Goon, I.Y., Parker, S.G., Amal, R., Justin Gooding, J., 2012.

5 *Chemical communications* 48(29), 3503-3505.

6 Dey, A., Kaushik, A., Arya, S.K., Bhansali, S., 2012. *Journal of Materials Chemistry*

7 22(29), 14763.

8 Kim, D.J., Lee, N.E., Park, J.S., Park, I.J., Kim, J.G., Cho, H.J., 2010. *Biosens*

9 *Bioelectron* 25(11), 2477

10 Liang, J., Yao, C., Li, X., Wu, Z., Huang, C., Fu, Q., Lan, C., Cao, D., Tang, Y., 2015.

11 *Biosens. Bioelectron.* 69, 128-134.-2482.

12 Liu, D., Huang, X., Wang, Z., Jin, A., Sun, X., Zhu, L., Wang, F., Ma, Y., Niu, G.,

13 Hight Walker, A.R., Chen, X., 2013. *ACS Nano* 7(6), 5568-5576.

14 Wang, Z., Liu, N., Feng, F., Ma, Z., 2015. *Biosens Bioelectron* 70, 98-105.

15 Wu, X., Xu, L., Liu, L., Ma, W., Yin, H., Kuang, H., Wang, L., Xu, C., Kotov, N.A.,

16 2013. *Journal of the American Chemical Society* 135(49), 18629-18636.

17 Xu, L., Yan, W., Ma, W., Kuang, H., Wu, X., Liu, L., Zhao, Y., Wang, L., Xu, C.,

18 2015. *Advanced Materials* 27(10), 1706-1711.

19 Yang, J., Wen, W., Zhang, X., Wang, S., 2015. *Microchimica Acta* 182(9-10), 1855-

20 1861.

21
